# Supplementary material for: Clinical Significance of miR-149 in the Survival of Patients with Laryngeal Squamous Cell Carcinoma
Source: Hindawi journal article supplement (doi:10.1155/2016/8561251), 2016-01-01
Supplement: f1 [file 8561251.f1.docx]

Supplemental document

Table 1. Demographic information of vocal cord polyp controls and laryngeal carcinoma patients

|  | Vocal cord polyp | Laryngeal carcinoma |
| --- | --- | --- |
| N | 46 | 97 |
| Age (mean ± SD) | 61.9 ±12.7 | 63.8 ± 13.4 |
| Gender (M/F) | 34/12 | 73/24 |
| Smoking status (N/Y) | 19/27 | 61/36 * |

N：non-smoker; Y: with smoking habit; M: male, F: female; *, *P*<0.05, difference in smoking status analyzed by *X2*-test.
